# Supplementary material for: Phylotypic Diversity of Bacteria Associated with Speleothems of a Silicate Cave in a Guiana Shield Tepui
Source: MDPI journal article supplement (doi:10.3390/microorganisms10071395), 2022-07-11
Supplement: s1 [file s1]

Supplementary materials (Figures S1 to S13 and Table S1) of

“Phylotypic diversity of bacteria associated with speleothems of a  
silicate cave in a Guiana Shield tepui, Venezuela”

by Qi Liu\*, Zichen He\*, Takeshi Naganuma, Ryosuke Nakai, Luz María  
Rodríguez, Rafael Carreño and Franco Urbani

\* Co-first authors

Corresponding author: [takn@hiroshima-u.ac.jp](mailto:takn@hiroshima-u.ac.jp)

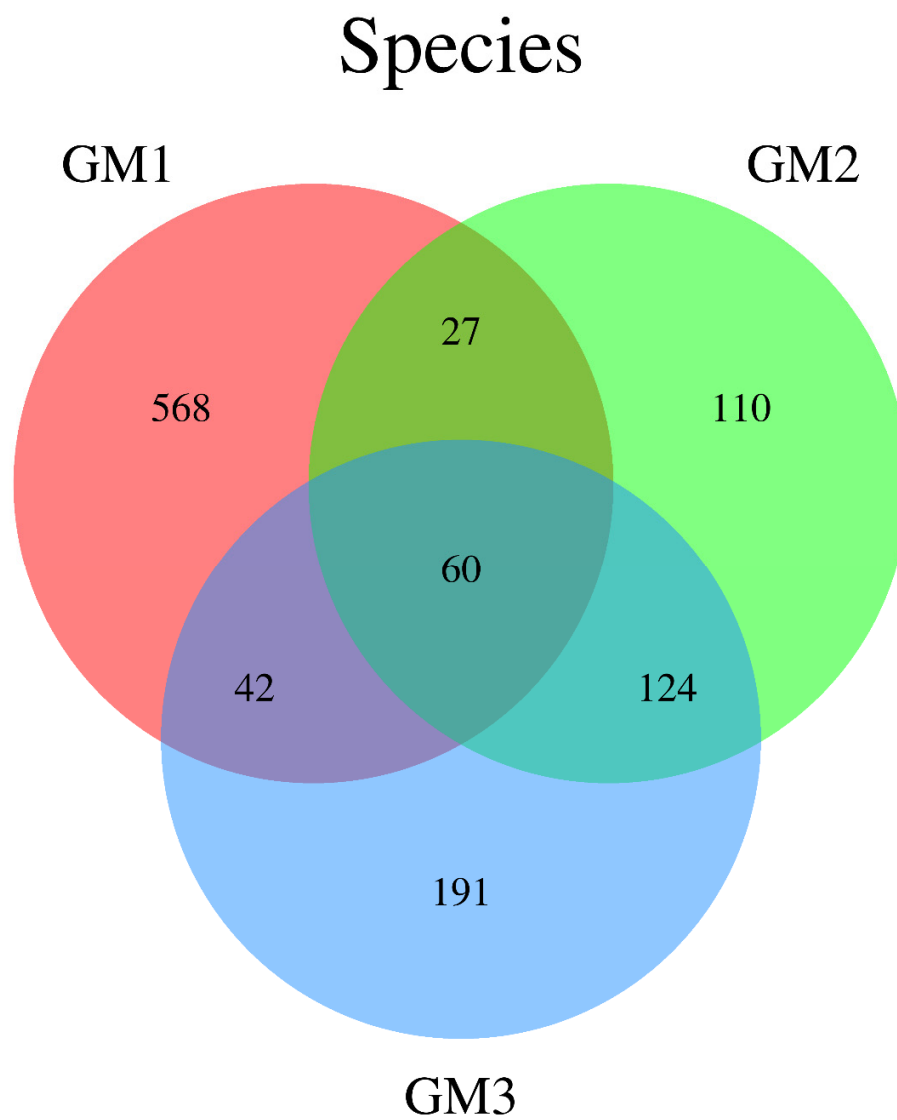

Figure S1. Venn diagram showing the distribution of OTU-affiliated species in GM1, GM2 and GM3 speleothems and their intersections.

## Venn (Genus)

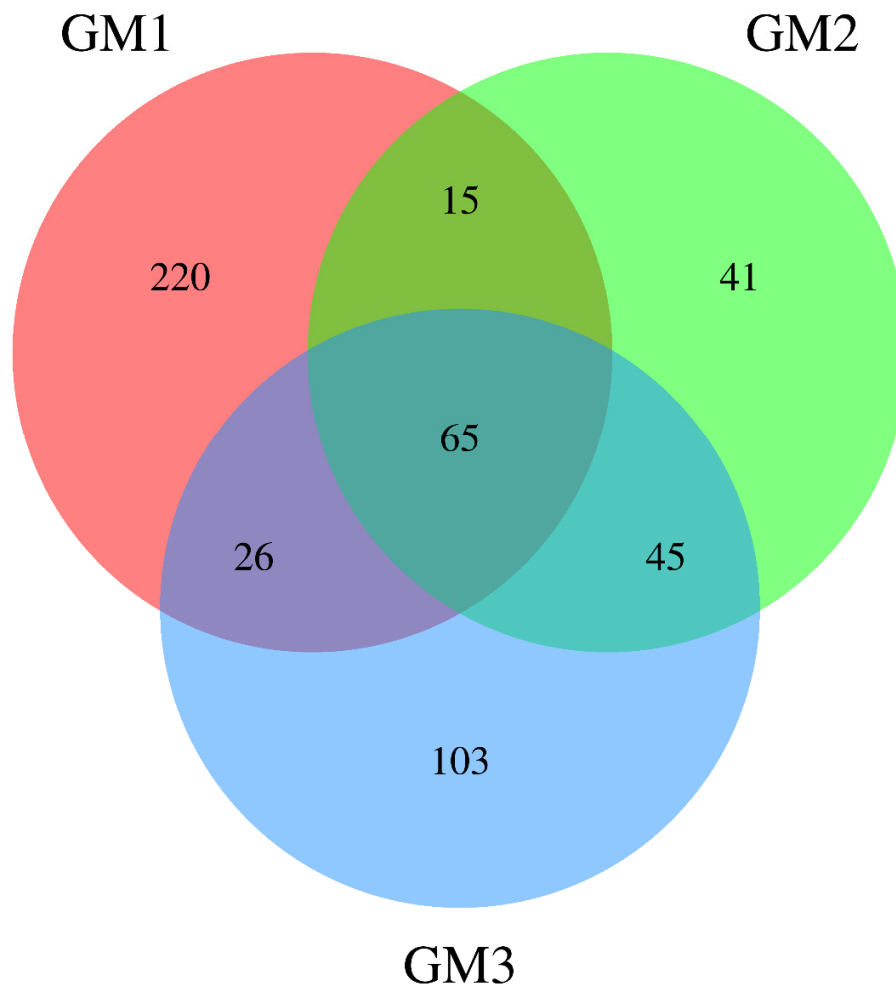

Figure S2. Venn diagram showing the distribution of OTU-affiliated genera in GM1, GM2 and GM3 speleothems and their intersections.

## Venn (Family)

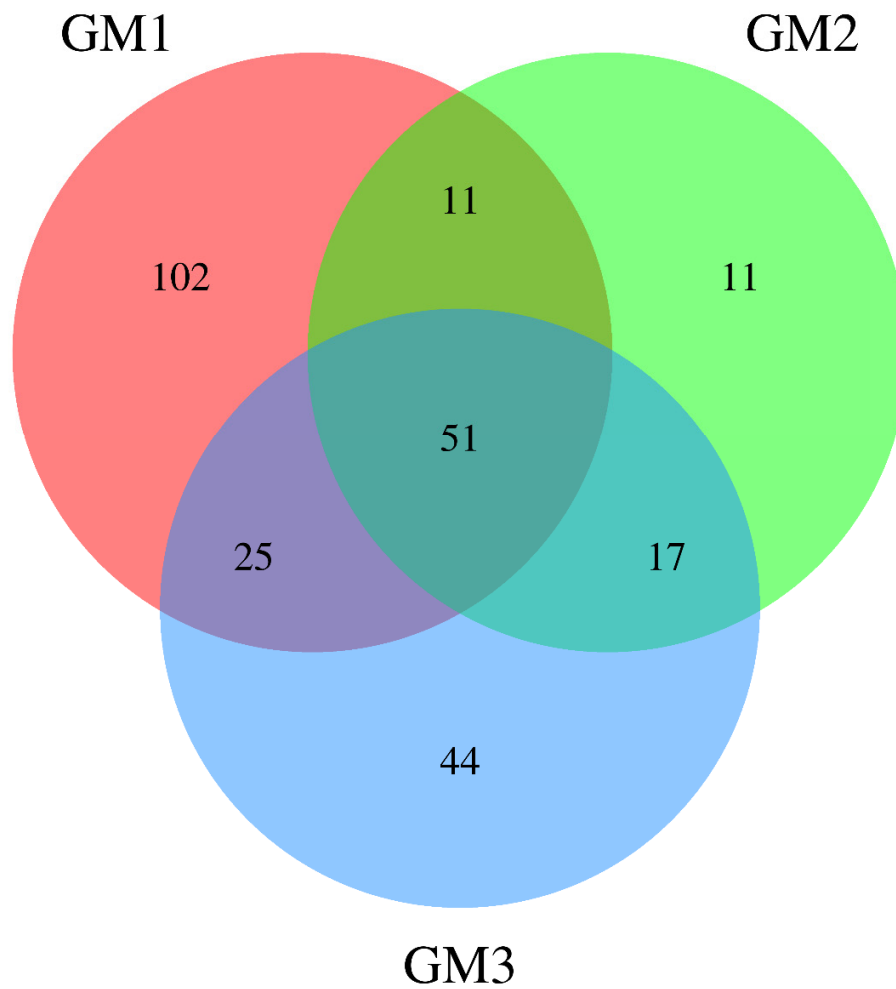

Figure S3. Venn diagram showing the distribution of OTU-affiliated families in GM1, GM2 and GM3 speleothems and their intersections.

## Venn (Order)

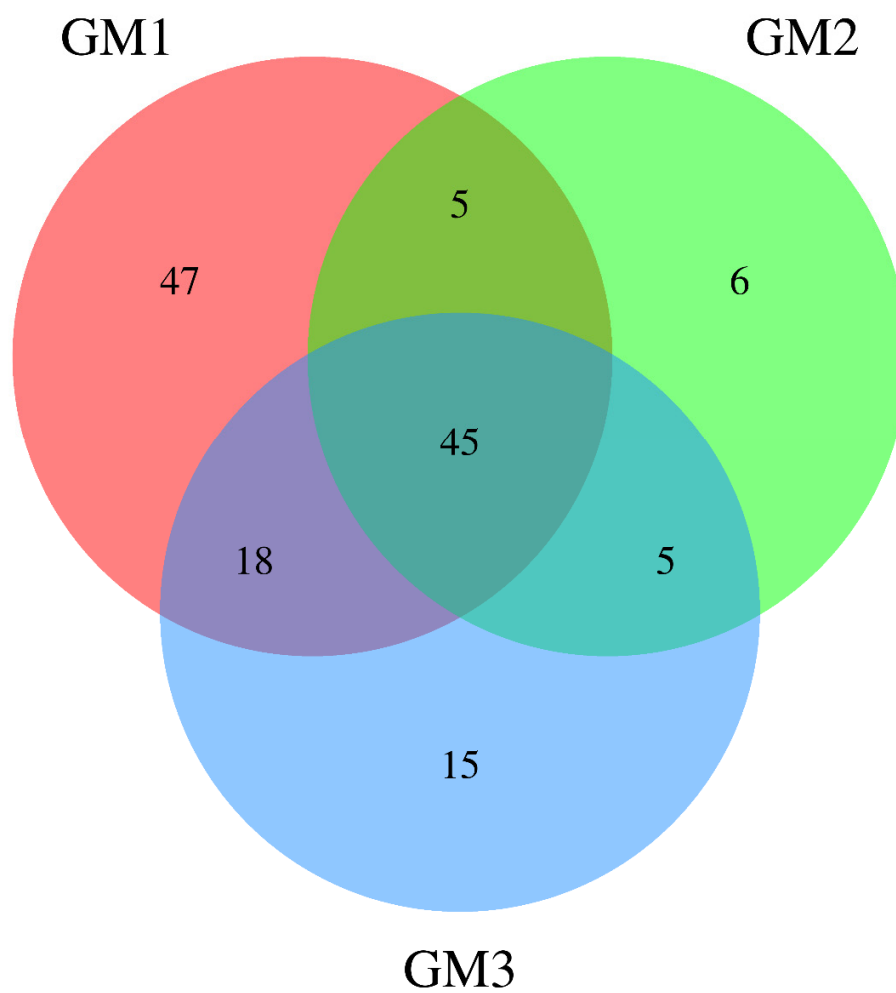

Figure S4. Venn diagram showing the distribution of OTU-affiliated orders in GM1, GM2 and GM3 speleothems and their intersections.

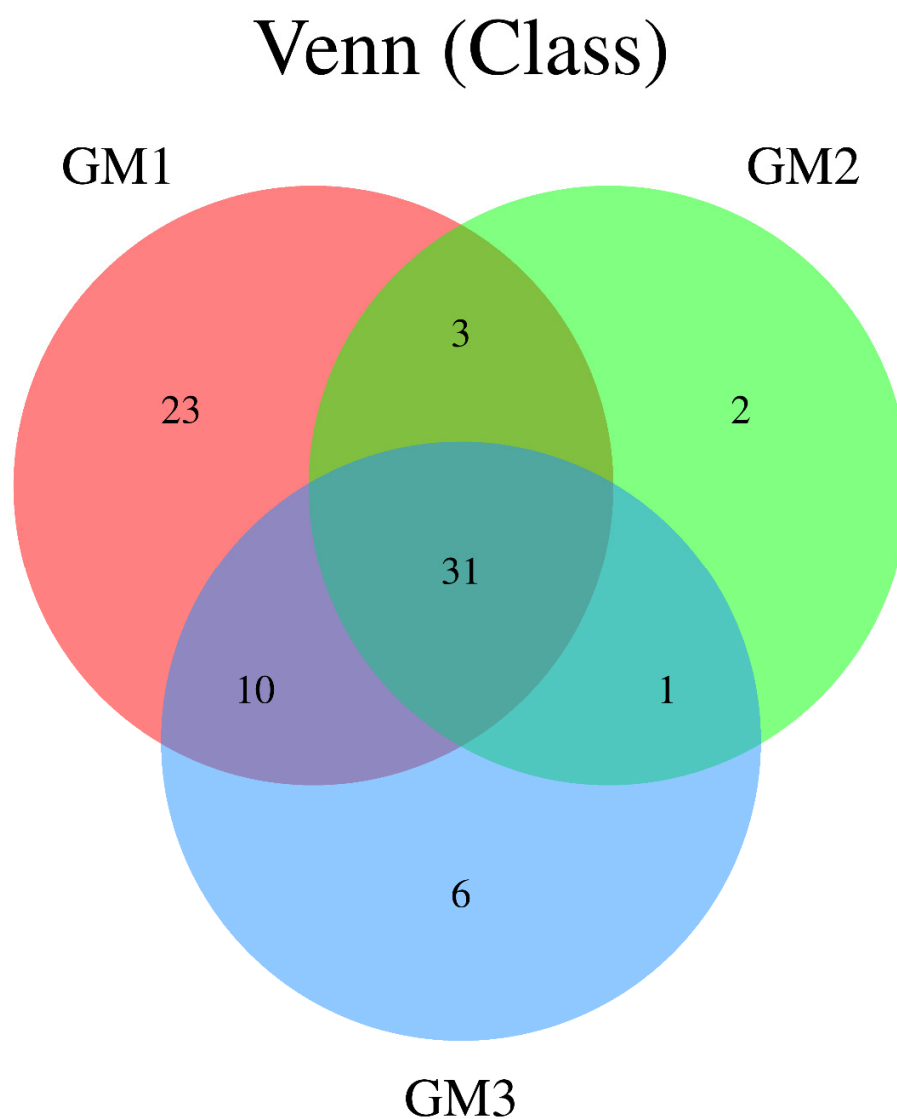

Figure S5. Venn diagram showing the distribution of OTU-affiliated classes in GM1, GM2 and GM3 speleothems and their intersections.

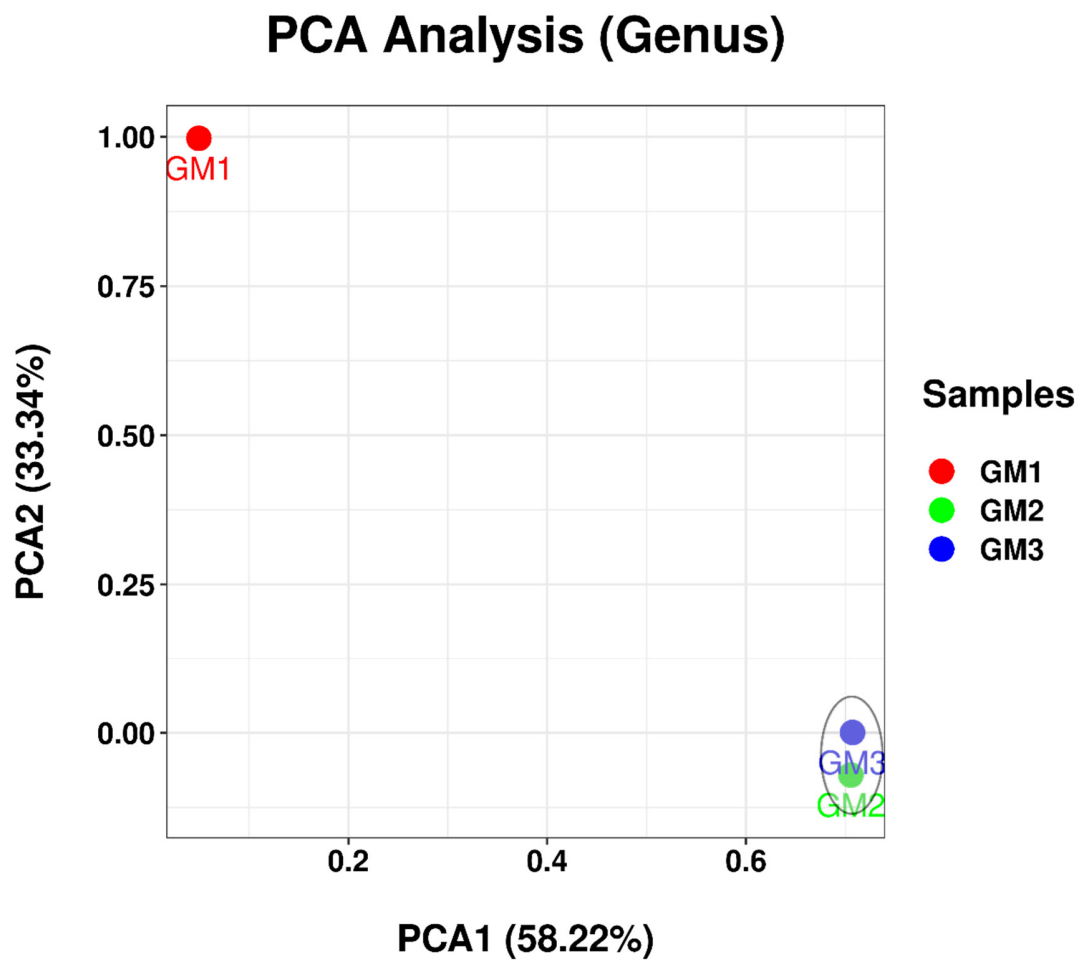

Figure S6. PCA plots of OTU-affiliated genera in the GM1, GM2 and GM3 speleothems.

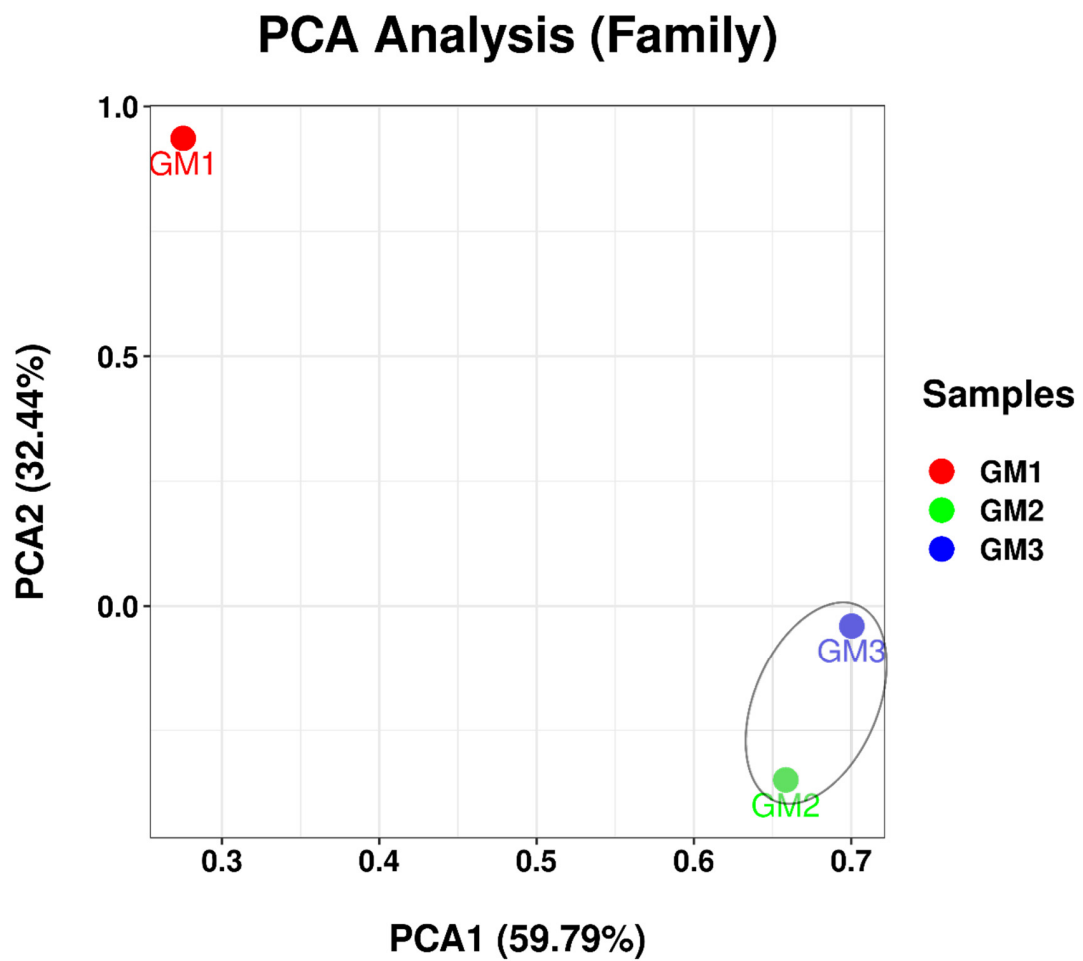

Figure S7. PCA plots of OTU-affiliated families in the GM1, GM2 and GM3 speleothems.



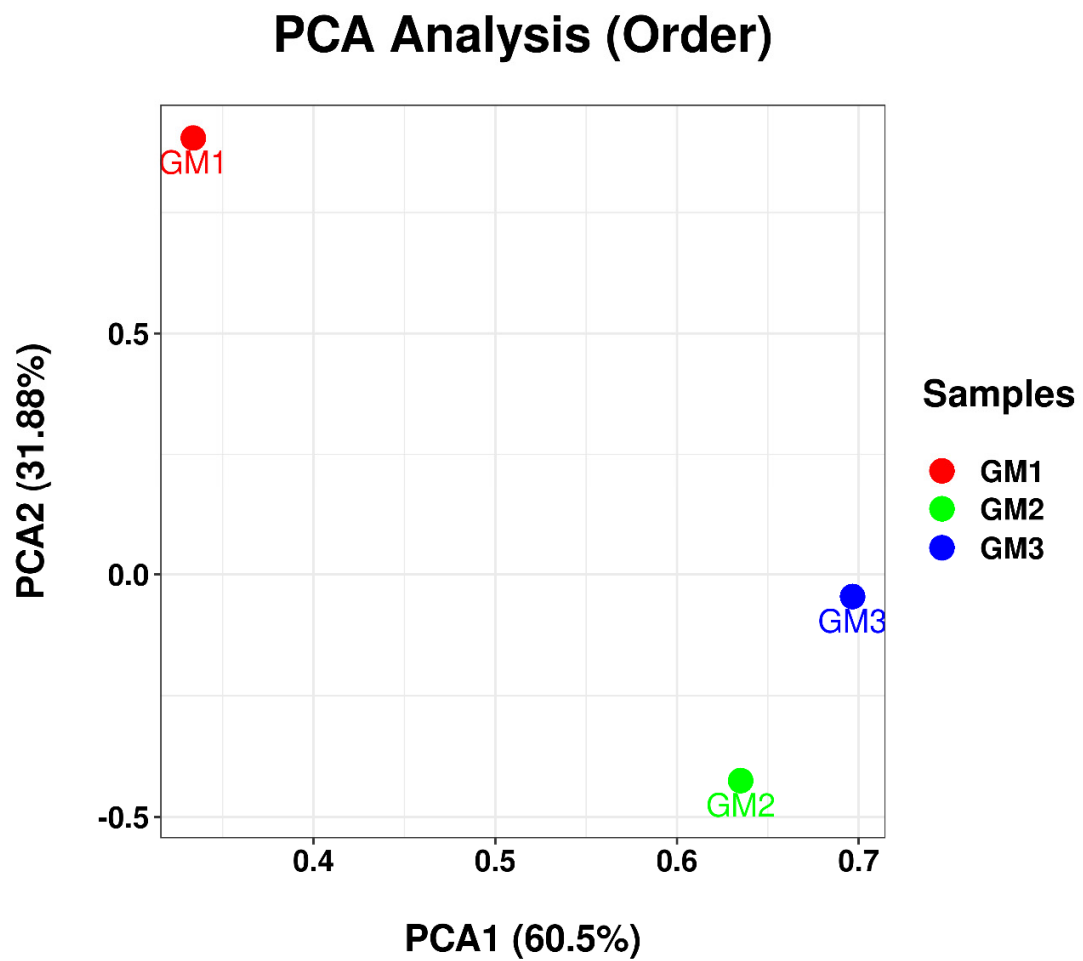

Figure S8. PCA plots of OTU-affiliated orders in the GM1, GM2 and GM3 speleothems.

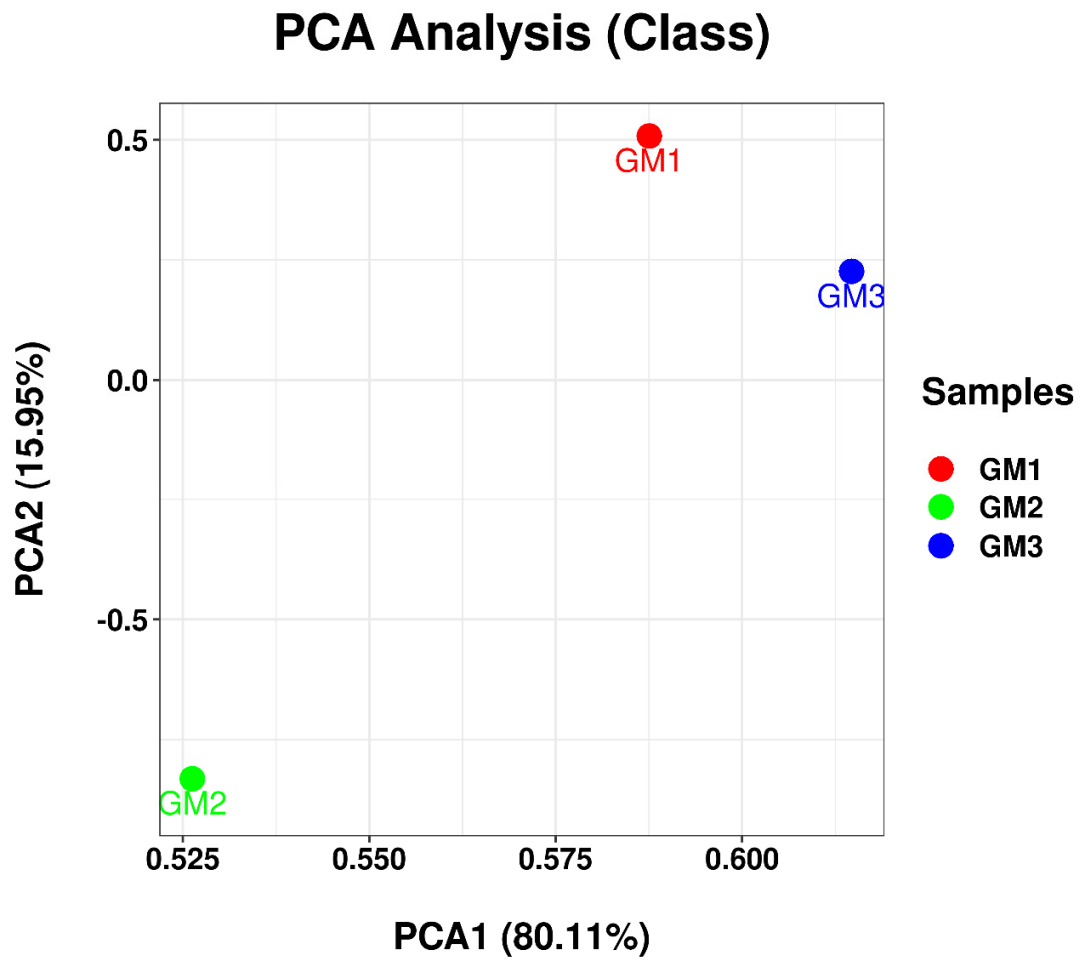

Figure S9. PCA plots of OTU-affiliated classes in the GM1, GM2 and GM3 speleothems.

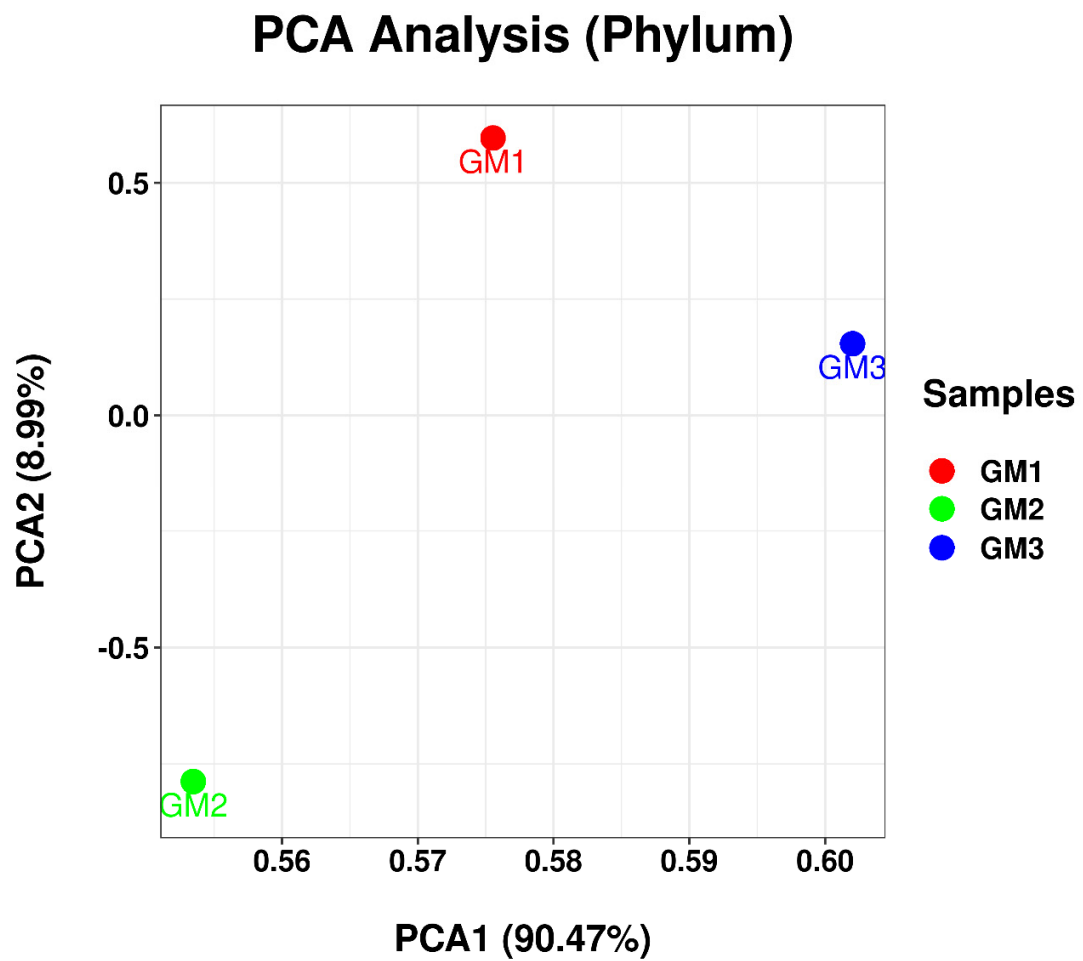

Figure S10. PCA plots of OTU-affiliated phyla in the GM1, GM2 and GM3 speleothems.

|                    |                                 |                                 |                                |
|--------------------|---------------------------------|---------------------------------|--------------------------------|
| a: AY913277_s      | z: JN802363_s                   | c4: Planctomycetales            | e9: Betaproteobacteria         |
| b: PAC001876_g     | a0: JF266448_g                  | c5: Planctomycetia              | f0: Myxococcales               |
| c: PAC000071_f     | a1: Pseudonocardiaaceae         | c6: Planctomycetes              | f1: Deltaproteobacteria        |
| d: PAC000071_o     | a2: Pseudonocardiales           | c7: EF492928_s                  | f2: Solimonadaceae_uc          |
| e: PAC000071_c     | a3: Streptomycesavellaneusgroup | c8: EF492928_g                  | f3: Solimonadaceae             |
| f: AD3             | a4: Kitasatospora               | c9: Methylocellasilvestrisgroup | f4: Nevskiales                 |
| g: PAC000030_g_uc  | a5: Streptomycetaceae           | d0: Methylocella                | f5: Cavicella_uc               |
| h: PAC000030_g     | a6: Streptomycetales            | d1: Beijerinckiaaceae           | f6: Cavicellaterranea          |
| i: AY913248_s      | a7: Actinobacteria_c            | d2: Rhizobiales                 | f7: Cavicella                  |
| j: PAC000046_g_uc  | a8: Actinobacteria              | d3: Acidisphaera_uc             | f8: EF516037_s                 |
| k: PAC000046_g     | a9: JX133647_f                  | d4: Acidisphaera                | f9: EU636037_s                 |
| l: HM445442_s      | b0: JX133647_o                  | d5: Acetobacteraceae            | g0: EU636037_g                 |
| m: PAC000121_g_uc  | b1: EU680443_f                  | d6: Rhodospirillales            | g1: Moraxellaceae              |
| n: PAC001856_s     | b2: Ktedonobacteraceae          | d7: Alphaproteobacteria         | g2: Pseudomonadales            |
| o: PAC000121_g     | b3: Ktedonobacteriales          | d8: Burkholderiathailandensis   | g3: Dyellaagri                 |
| p: PAC000121_f     | b4: Ktedonobacteria             | d9: Burkholderia                | g4: Dyellakunghuensis          |
| q: PAC000121_o     | b5: Chloroflexi                 | e0: Burkholderiaceae            | g5: Dyellaterrae               |
| r: HQ598430_s      | b6: JF833920_s                  | e1: Paraherbaspirillum          | g6: Dyella                     |
| s: PAC002115_g_uc  | b7: Nitrospira                  | e2: Paraherbaspirillum          | g7: Rhodanobacterdenitrificans |
| t: PAC002115_s     | b8: Nitrospiraceae              | e3: Oxalobacteraceae            | g8: Rhodanobacterglycinis      |
| u: PAC002115_g     | b9: Nitrospirales               | e4: Burkholderiales             | g9: Rhodanobacter              |
| v: PAC002115_f     | c0: PAC001956_f                 | e5: EF516098_s                  | h0: Xanthomonadaceae           |
| w: Solibacteriales | c1: PAC001956_o                 | e6: AF467301_g                  | h1: Xanthomonadales            |
| x: Solibacteres    | c2: Nitrospira_c                | e7: PAC002541_f                 | h2: Gammaproteobacteria        |
| y: Acidobacteria   | c3: Nitrospirae                 | e8: PAC002541_o                 | h3: Proteobacteria             |

Figure S11. Expedient taxonomic names corresponding to the codes in the LEfSe cladogram (Figure 9 in the main text). More correct taxonomic names/ranks shown in the supplementary Table S1 as well as Table 3 in the main text.

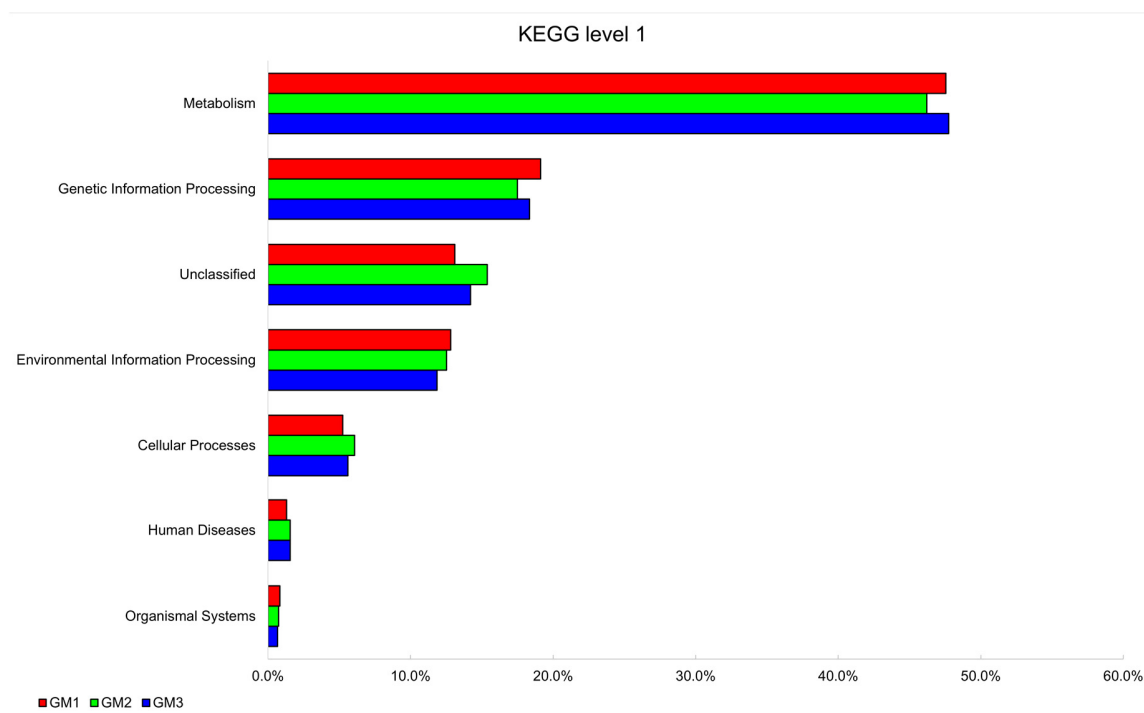

Figure S12. KEGG Level 1 metabolic pathways of GM1 (red), GM2 (green) and GM3 (blue) speleothem microbiomes. Pathways are shown in the order of relative abundances in GM1.

Higher resolution is provided by a [separate PNG image](#)  
“Churi\_FigS13\_KEGG\_Level-3\_all”.

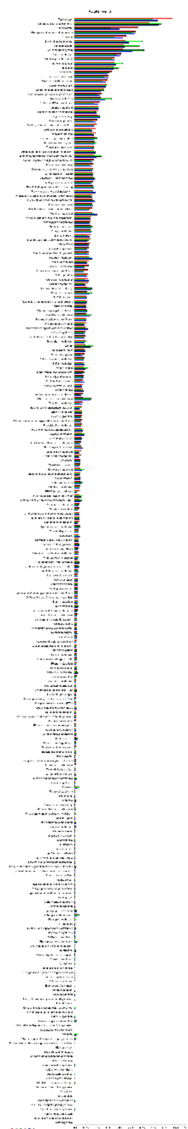

Figure S13. KEGG Level 3 pathways of GM1 (red), GM2 (green) and GM3 (blue) speleothem microbiomes. Pathways are shown in the order of relative abundances in GM1.

**Table S1.** Taxonomic biomarkers having LDA scores >4 and their corresponding codes in Figures 9 and S11.

| Group | Code in<br>Figs. 9<br>and S11 | Biomarker name                                                                                          | LDA value |
|-------|-------------------------------|---------------------------------------------------------------------------------------------------------|-----------|
| GM2   | h0                            | Bacteria.Proteobacteria.Gammaproteobacteria.Xanthomonadales.Xanthomonadaceae                            | 5.5023461 |
| GM2   | h1                            | Bacteria.Proteobacteria.Gammaproteobacteria.Xanthomonadales                                             | 5.4993716 |
| GM2   | g6                            | Bacteria.Proteobacteria.Gammaproteobacteria.Xanthomonadales.Xanthomonadaceae.Dyella                     | 5.4508021 |
| GM2   | h2                            | Bacteria.Proteobacteria.Gammaproteobacteria                                                             | 5.3604338 |
| GM2   | g4                            | Bacteria.Proteobacteria.Gammaproteobacteria.Xanthomonadales.Xanthomonadaceae.Dyella.Dyella kyungheensis | 5.2825178 |
| GM2   | h3                            | Bacteria.Proteobacteria                                                                                 | 5.2760763 |
| GM1   | p                             | Bacteria.Acidobacteria.Solibacteres.PAC000121_o.PAC000121_f                                             | 5.2235904 |
| GM1   | q                             | Bacteria.Acidobacteria.Solibacteres.PAC000121_o                                                         | 5.2217286 |
| GM1   | y                             | Bacteria.Acidobacteria                                                                                  | 5.1609085 |
| GM1   | x                             | Bacteria.Acidobacteria.Solibacteres                                                                     | 5.1535597 |
| GM3   | g5                            | Bacteria.Proteobacteria.Gammaproteobacteria.Xanthomonadales.Xanthomonadaceae.Dyella.Dyella terrae       | 5.0766446 |
| GM3   | v                             | Bacteria.Acidobacteria.Solibacteres.Solibacterales.PAC002115_f                                          | 5.0363154 |
| GM3   | u                             | Bacteria.Acidobacteria.Solibacteres.Solibacterales.PAC002115_f.PAC002115_g                              | 5.0205626 |
| GM3   | w                             | Bacteria.Acidobacteria.Solibacteres.Solibacterales                                                      | 5.0108374 |
| GM1   | g1                            | Bacteria.Proteobacteria.Gammaproteobacteria.Pseudomonadales.Moraxellaceae                               | 4.9736407 |
| GM1   | a2                            | Bacteria.Proteobacteria.Gammaproteobacteria.Pseudomonadales                                             | 4.9679824 |
| GM3   | d7                            | Bacteria.Proteobacteria.Alphaproteobacteria                                                             | 4.9443965 |
| GM1   | k                             | Bacteria.Acidobacteria.Solibacteres.PAC000121_o.PAC000121_f.PAC000046_g                                 | 4.9222454 |
| GM1   | o                             | Bacteria.Acidobacteria.Solibacteres.PAC000121_o.PAC000121_f.PAC000121_g                                 | 4.9214991 |
| GM2   | g3                            | Bacteria.Proteobacteria.Gammaproteobacteria.Xanthomonadales.Xanthomonadaceae.Dyella.Dyella agri         | 4.8336432 |
| GM3   | d1                            | Bacteria.Proteobacteria.Alphaproteobacteria.Rhizobiales.Beijerinckiaceae                                | 4.8074057 |
| GM3   | d2                            | Bacteria.Proteobacteria.Alphaproteobacteria.Rhizobiales                                                 | 4.7880641 |
| GM1   | g0                            | Bacteria.Proteobacteria.Gammaproteobacteria.Pseudomonadales.Moraxellaceae.EU636037_g                    | 4.7445247 |
| GM1   | b4                            | Bacteria.Chloroflexi.Ktedonobacteria                                                                    | 4.7172949 |
| GM1   | b5                            | Bacteria.Chloroflexi                                                                                    | 4.7117704 |

|     |    |                                                                                                                         |           |
|-----|----|-------------------------------------------------------------------------------------------------------------------------|-----------|
| GM3 | t  | Bacteria.Acidobacteria.Solibacteres.Solibacterales.PAC002115_f.PAC002115_g.PAC002115_s                                  | 4.6739806 |
| GM2 | g9 | Bacteria.Proteobacteria.Gammaproteobacteria.Xanthomonadales.Xanthomonadaceae.Rhodanobacter                              | 4.6703148 |
| GM3 | d0 | Bacteria.Proteobacteria.Alphaproteobacteria.Rhizobiales.Beijerinckiaceae.Methylocella                                   | 4.6700005 |
| GM3 | c9 | Bacteria.Proteobacteria.Alphaproteobacteria.Rhizobiales.Beijerinckiaceae.Methylocella.Methylocella silvestris group     | 4.6621020 |
| GM3 | g  | Bacteria.Acidobacteria.Solibacteres.PAC000121_o.PAC000121_f.PAC000030_g.PAC000030_g_uc                                  | 4.6519412 |
| GM3 | h  | Bacteria.Acidobacteria.Solibacteres.PAC000121_o.PAC000121_f.PAC000030_g                                                 | 4.6498736 |
| GM2 | a8 | Bacteria.Actinobacteria                                                                                                 | 4.6455902 |
| GM1 | m  | Bacteria.Acidobacteria.Solibacteres.PAC000121_o.PAC000121_f.PAC000121_g.PAC000121_g_uc                                  | 4.6383252 |
| GM1 | e9 | Bacteria.Proteobacteria.Betaproteobacteria                                                                              | 4.6331960 |
| GM3 | a7 | Bacteria.Actinobacteria.Actinobacteria_c                                                                                | 4.6165807 |
| GM1 | b3 | Bacteria.Chloroflexi.Ktedonobacteria.Ktedonobacterales                                                                  | 4.5482081 |
| GM1 | f7 | Bacteria.Proteobacteria.Gammaproteobacteria.Pseudomonadales.Moraxellaceae.Cavicella                                     | 4.5375184 |
| GM2 | a5 | Bacteria.Actinobacteria.Actinobacteria_c.Streptomycetales.Streptomycetaceae                                             | 4.5124585 |
| GM3 | s  | Bacteria.Acidobacteria.Solibacteres.Solibacterales.PAC002115_f.PAC002115_g.PAC002115_g_uc                               | 4.5105809 |
| GM2 | a6 | Bacteria.Actinobacteria.Actinobacteria_c.Streptomycetales                                                               | 4.5082925 |
| GM2 | a4 | Bacteria.Actinobacteria.Actinobacteria_c.Streptomycetales.Streptomycetaceae.Kitasatospora                               | 4.5077466 |
| GM2 | a3 | Bacteria.Actinobacteria.Actinobacteria_c.Streptomycetales.Streptomycetaceae.Kitasatospora.Streptomyces avellaneus group | 4.5020525 |
| GM2 | g7 | Bacteria.Proteobacteria.Gammaproteobacteria.Xanthomonadales.Xanthomonadaceae.Rhodanobacter.Rhodanobacter denitrificans  | 4.4695201 |
| GM1 | f9 | Bacteria.Proteobacteria.Gammaproteobacteria.Pseudomonadales.Moraxellaceae.EU636037_g.EU636037_s                         | 4.4561180 |
| GM1 | f8 | Bacteria.Proteobacteria.Gammaproteobacteria.Pseudomonadales.Moraxellaceae.EU636037_g.EF516037_s                         | 4.4312256 |
| GM1 | e4 | Bacteria.Proteobacteria.Betaproteobacteria.Burkholderiales                                                              | 4.4205926 |
| GM1 | c3 | Bacteria.Nitrospirae                                                                                                    | 4.4151632 |
| GM1 | c2 | Bacteria.Nitrospirae.Nitrospira_c                                                                                       | 4.4145500 |
| GM3 | d6 | Bacteria.Proteobacteria.Alphaproteobacteria.Rhodospirillales                                                            | 4.4018457 |
| GM1 | j  | Bacteria.Acidobacteria.Solibacteres.PAC000121_o.PAC000121_f.PAC000046_g.PAC000046_g_uc                                  | 4.3575440 |
| GM3 | a1 | Bacteria.Actinobacteria.Actinobacteria_c.Pseudonocardiales.Pseudonocardiaceae                                           | 4.3414036 |
| GM3 | d5 | Bacteria.Proteobacteria.Alphaproteobacteria.Rhodospirillales.Acetobacteraceae                                           | 4.3308215 |
| GM3 | a2 | Bacteria.Actinobacteria.Actinobacteria_c.Pseudonocardiales                                                              | 4.3243960 |
| GM1 | i  | Bacteria.Acidobacteria.Solibacteres.PAC000121_o.PAC000121_f.PAC000046_g.AY913248_s                                      | 4.3218226 |
| GM3 | d4 | Bacteria.Proteobacteria.Alphaproteobacteria.Rhodospirillales.Acetobacteraceae.Acidisphaera                              | 4.3082643 |



|     |    |                                                                                                                        |           |
|-----|----|------------------------------------------------------------------------------------------------------------------------|-----------|
| GM1 | f6 | Bacteria.Proteobacteria.Gammaproteobacteria.Pseudomonadales.Moraxellaceae.Cavicella.Cavicella subterranea              | 4.3062015 |
| GM3 | a0 | Bacteria.Actinobacteria.Actinobacteria_c.Pseudonocardiales.Pseudonocardaceae.JF266448_g                                | 4.2918022 |
| GM1 | b1 | Bacteria.Chloroflexi.Ktedonobacteria.Ktedonobacterales.EU680443_f                                                      | 4.2865398 |
| GM1 | e3 | Bacteria.Proteobacteria.Betaproteobacteria.Burkholderiales.Oxalobacteraceae                                            | 4.2430713 |
| GM1 | e6 | Bacteria.Proteobacteria.Betaproteobacteria.PAC002541_o.PAC002541_f.AF467301_g                                          | 4.2280026 |
| GM1 | e5 | Bacteria.Proteobacteria.Betaproteobacteria.PAC002541_o.PAC002541_f.AF467301_g.EF516098_s                               | 4.2236958 |
| GM2 | f2 | Bacteria.Proteobacteria.Gammaproteobacteria.Nevskiales.Solimonadaceae.Solimonadaceae_uc                                | 4.2130134 |
| GM2 | f4 | Bacteria.Proteobacteria.Gammaproteobacteria.Nevskiales                                                                 | 4.2097695 |
| GM1 | e7 | Bacteria.Proteobacteria.Betaproteobacteria.PAC002541_o.PAC002541_f                                                     | 4.1961804 |
| GM1 | e8 | Bacteria.Proteobacteria.Betaproteobacteria.PAC002541_o                                                                 | 4.1942640 |
| GM1 | b9 | Bacteria.Nitrospirae.Nitrospira_c.Nitrospirales                                                                        | 4.1910190 |
| GM1 | f5 | Bacteria.Proteobacteria.Gammaproteobacteria.Pseudomonadales.Moraxellaceae.Cavicella.Cavicella_uc                       | 4.1905865 |
| GM2 | f3 | Bacteria.Proteobacteria.Gammaproteobacteria.Nevskiales.Solimonadaceae                                                  | 4.1861820 |
| GM1 | e  | Bacteria.AD3.PAC000071_c                                                                                               | 4.1803846 |
| GM1 | f  | Bacteria.AD3                                                                                                           | 4.1709352 |
| GM2 | g8 | Bacteria.Proteobacteria.Gammaproteobacteria.Xanthomonadales.Xanthomonadaceae.Rhodanobacter.Rhodanobacter glycinis      | 4.1641379 |
| GM1 | e2 | Bacteria.Proteobacteria.Betaproteobacteria.Burkholderiales.Oxalobacteraceae.Paraherbaspirillum                         | 4.1484142 |
| GM3 | c7 | Bacteria.Proteobacteria.Alphaproteobacteria.Rhizobiales.Beijerinckiaceae.EF492928_g.EF492928_s                         | 4.1358511 |
| GM1 | n  | Bacteria.Acidobacteria.Solibacteres.PAC000121_o.PAC000121_f.PAC000121_g.PAC001856_s                                    | 4.1347981 |
| GM1 | e1 | Bacteria.Proteobacteria.Betaproteobacteria.Burkholderiales.Oxalobacteraceae.Paraherbaspirillum.Paraherbaspirillum soli | 4.1264952 |
| GM1 | b7 | Bacteria.Nitrospirae.Nitrospira_c.Nitrospirales.Nitrospiraceae.Nitrospira                                              | 4.1249626 |
| GM3 | c8 | Bacteria.Proteobacteria.Alphaproteobacteria.Rhizobiales.Beijerinckiaceae.EF492928_g                                    | 4.1209020 |
| GM1 | d  | Bacteria.AD3.PAC000071_c.PAC000071_o                                                                                   | 4.1178297 |
| GM1 | b8 | Bacteria.Nitrospirae.Nitrospira_c.Nitrospirales.Nitrospiraceae                                                         | 4.1169642 |
| GM1 | b2 | Bacteria.Chloroflexi.Ktedonobacteria.Ktedonobacterales.Ktedonobacteraceae                                              | 4.1164177 |
| GM1 | c  | Bacteria.AD3.PAC000071_c.PAC000071_o.PAC000071_f                                                                       | 4.1144296 |
| GM1 | b0 | Bacteria.Chloroflexi.Ktedonobacteria.JX133647_o                                                                        | 4.1091602 |
| GM1 | f1 | Bacteria.Proteobacteria.Deltaproteobacteria                                                                            | 4.1069732 |
| GM1 | a9 | Bacteria.Chloroflexi.Ktedonobacteria.JX133647_o.JX133647_f                                                             | 4.0944512 |
| GM1 | b6 | Bacteria.Nitrospirae.Nitrospira_c.Nitrospirales.Nitrospiraceae.Nitrospira.JF833920_s                                   | 4.0731428 |

|     |    |                                                                                                                     |           |
|-----|----|---------------------------------------------------------------------------------------------------------------------|-----------|
| GM3 | r  | Bacteria.Acidobacteria.Solibacteres.Solibacterales.PAC002115_f.PAC002115_g.HQ598430_s                               | 4.0726757 |
| GM3 | d3 | Bacteria.Proteobacteria.Alphaproteobacteria.Rhodospirillales.Acetobacteraceae.Acidisphaera.Acidisphaera_uc          | 4.0663275 |
| GM1 | f0 | Bacteria.Proteobacteria.Deltaproteobacteria.Myxococcales                                                            | 4.0598046 |
| GM1 | l  | Bacteria.Acidobacteria.Solibacteres.PAC000121_o.PAC000121_f.PAC000121_g.HM445442_s                                  | 4.0543192 |
| GM1 | b  | Bacteria.AD3.PAC000071_c.PAC000071_o.PAC000071_f.PAC001876_g                                                        | 4.0500772 |
| GM2 | d9 | Bacteria.Proteobacteria.Betaproteobacteria.Burkholderiales.Burkholderiaceae.Burkholderia                            | 4.0469921 |
| GM3 | z  | Bacteria.Actinobacteria.Actinobacteria_c.Pseudonocardiales.Pseudonocardiaceae.JF266448_g.JN802363_s                 | 4.0422871 |
| GM1 | a  | Bacteria.AD3.PAC000071_c.PAC000071_o.PAC000071_f.PAC001876_g.AY913277_s                                             | 4.0304835 |
| GM1 | c0 | Bacteria.Nitrospirae.Nitrospira_c.PAC001956_o.PAC001956_f                                                           | 4.0283186 |
| GM2 | e0 | Bacteria.Proteobacteria.Betaproteobacteria.Burkholderiales.Burkholderiaceae                                         | 4.0263344 |
| GM3 | c5 | Bacteria.Planctomycetes.Planctomycetia                                                                              | 4.0240183 |
| GM2 | d8 | Bacteria.Proteobacteria.Betaproteobacteria.Burkholderiales.Burkholderiaceae.Burkholderia.Burkholderia thailandensis | 4.0239661 |
| GM3 | c4 | Bacteria.Planctomycetes.Planctomycetia.Planctomycetales                                                             | 4.0200374 |
| GM1 | c1 | Bacteria.Nitrospirae.Nitrospira_c.PAC001956_o                                                                       | 4.0178095 |
| GM3 | c6 | Bacteria.Planctomycetes                                                                                             | 4.0050660 |
